# Supplementary material
Source: PubMed Central journal article supplement (PMC2754119)
Supplement: NIHMS112702-supplement-webappendix.pdf [file NIHMS112702-supplement-webappendix.pdf]

# Comparing treatments in the presence of crossing survival curves: an application to bone marrow transplantation

## Web Appendix A: Variance of the Weighted Kaplan-Meier Statistic

The weighted Kaplan-Meier test under  $H_0$  is equivalent to

$$W_{\text{WKM}}(t_0) = \int_{t_0}^{t_m} \hat{w}(t) \left[ \left\{ \hat{S}_1(t) - S_1(t) \right\} - \left\{ \hat{S}_0(t) - S_0(t) \right\} \right] dt = W_1 - W_0,$$

where

$$W_k = \int_0^{t_m} \hat{w}(t) \left\{ \hat{S}_k(t) - S_k(t) \right\} I(t > t_0) dt.$$

Suppose that  $n_k/n \rightarrow p_k < 1$  for  $k = 0, 1$ , and that there exists a non-negative function  $w$  such that  $\hat{w}$  converges in probability uniformly on  $[0, t_m]$ . Since  $\hat{S}_k(t) - S_k(t)$  is asymptotically equivalent to  $-S_k(t) \int_0^t dM_k(u)$ , where  $M_k$  is a zero mean Gaussian martingale with independent increments, then  $W_k$  is asymptotically equivalent to

$$\begin{aligned} X_k &= - \int_0^{t_m} w(t) S_k(t) I(t > t_0) \left\{ \int_0^t dM_k(u) \right\} dt \\ &= - \int_0^{t_m} \left\{ \int_u^{t_m} w(t) S_k(t) I(t > t_0) dt \right\} dM_k(u) \\ &= - \int_0^{t_0} \left\{ \int_{t_0}^{t_m} w(t) S_k(t) dt \right\} dM_k(u) - \int_{t_0^+}^{t_m} \left\{ \int_t^{t_m} w(t) S_k(t) dt \right\} dM_k(u) \\ &= - \int_0^{t_m} \left\{ I(u \leq t_0) \int_{t_0}^{t_m} w(t) S_k(t) dt + I(u > t_0) \int_t^{t_m} w(t) S_k(t) dt \right\} dM_k(u). \end{aligned}$$

Then  $X_k$  has predictable variation process

$$\begin{aligned} \langle X_k \rangle_{t_m} &= \int_0^{t_m} \left\{ I(u \leq t_0) \int_{t_0}^{t_m} w(t) S_k(t) dt + I(u > t_0) \int_t^{t_m} w(t) S_k(t) dt \right\}^2 d\langle M_k \rangle(u) \\ &= \left\{ \int_{t_0}^{t_m} w(t) S_k(t) dt \right\}^2 \int_0^{t_0} \frac{\alpha_k(u)}{Y_k(u)} du + \int_{t_0^+}^{t_m} \left\{ \int_t^{t_m} w(t) S_k(t) dt \right\}^2 \frac{\alpha_k(u)}{Y_k(u)} du. \end{aligned}$$

The variance of  $X_k$  can be estimated by

$$\begin{aligned} \widehat{\text{Var}}(X_k) &= \left\{ \int_{t_0}^{t_m} \hat{w}(t) \hat{S}_k(t) dt \right\}^2 \sum_{j=1}^{\ell-1} \frac{d_{kj}}{Y_{kj}^2} + \sum_{j=\ell}^{m-1} \left\{ \int_{t_j}^{t_m} \hat{w}(t) \hat{S}_k(t) dt \right\}^2 \frac{d_{kj}}{Y_{kj}^2} \\ &= A_{k0}^2 \sum_{j=1}^{\ell-1} \frac{d_{kj}}{Y_{kj}^2} + \sum_{j=\ell}^{m-1} A_{kj}^2 \frac{d_{kj}}{Y_{kj}^2}. \end{aligned}$$

and under independent samples the variance of  $W_{\text{WKM}}(t_0)$  is  $\widehat{\text{Var}}_{\text{WKM}} = \sum_{k=0}^1 \widehat{\text{Var}}(X_k)$ .
